# Supplementary material
Source: PubMed Central journal article supplement (PMC4314047)
Supplement: ijcep0007-8532-f7.pdf [file ijcep0007-8532-f7.pdf]

## Gene expression profiling of craniofacial fibrous dysplasia

**Supplementary Table 4.** Correlation between clinico-pathological parameters and ADAMTS2 protein expression in 40 FD cases

|                  | n  | ADAMTS2 immunostaining |           | P value |
|------------------|----|------------------------|-----------|---------|
|                  |    | Low (%)                | High (%)  |         |
| Total            | 40 |                        |           |         |
| Gender           |    |                        |           |         |
| Male             | 17 | 7 (41.2)               | 10 (58.8) | 0.6457  |
| Female           | 23 | 16 (69.6)              | 7 (30.4)  |         |
| Age              |    |                        |           |         |
| ≤ 30             | 27 | 10 (37.0)              | 17 (63.0) | 0.4988  |
| > 30             | 13 | 6 (46.2)               | 7 (53.8)  |         |
| Location         |    |                        |           |         |
| maxillary bone   | 24 | 10 (41.7)              | 14 (58.3) | 0.8725  |
| mandibular bone  | 11 | 5 (45.4)               | 6 (54.6)  |         |
| multiple bone    | 5  | 2 (40.0)               | 3 (60.0)  |         |
| Stage            |    |                        |           |         |
| I quiescent      | 17 | 6 (35.3)               | 11 (64.7) | 0.8264  |
| II nonaggressive | 12 | 4 (33.3)               | 8 (66.7)  |         |
| IV aggressive    | 11 | 5 (45.5)               | 6 (54.5)  |         |
